# Supplementary material
Source: PubMed Central journal article supplement (PMC4357623)
Supplement: 13280_2014_548_MOESM1_ESM.pdf [file 13280_2014_548_MOESM1_ESM.pdf]

## **AMBIO**

Electronic Supplementary Material

*This supplementary material has not been peer reviewed.*

Title: **On the scope and management of pesticide pollution of Swedish groundwater resources: The Scanian example.**

Authors: Maria Åkesson, Charlotte J. Sparrenbom, Peter Dahlgvist, Stephen J. Fraser

**Table S1**

$^3\text{H}$ - $^3\text{He}$  analysis results. Tritogenic  $^3\text{He}$  is calculated based on an estimated recharge temperature (8°C) and altitude (40 m a.s.l.).

| Well | $^3\text{H}$<br>(TU) | Tritogenic $^3\text{He}$<br>(TU) | $^3\text{H}$ - $^3\text{He}$ age<br>(years)                        |
|------|----------------------|----------------------------------|--------------------------------------------------------------------|
| 1    | 8.27                 | <sup>a</sup>                     | n.a. (but $^3\text{H}$ alone indicates predominantly modern water) |
| 2    | 7.19                 | 2.8                              | 6                                                                  |
| 3    | 7.00                 | 2.0                              | 5                                                                  |
| 4    | 6.26                 | 22.4                             | 27                                                                 |
| 5    | 6.92                 | 9.5                              | 15                                                                 |
| 6    | 6.78                 | 7.6                              | 13                                                                 |
| 7    | 0.10                 | <sup>a</sup>                     | n.a. (but $^3\text{H}$ alone indicates old water)                  |
| 8    | 0.02                 | <sup>a</sup>                     | n.a. (but $^3\text{H}$ alone indicates old water)                  |
| 9    | 6.86                 | 5.7                              | 11                                                                 |
| 10   | 5.96                 | 6.2                              | 13                                                                 |
| 11   | 7.60                 | 0.5                              | 1                                                                  |
| 12   | 5.23                 | 15                               | 24                                                                 |
| 13   | 7.62                 | 0.8                              | 2                                                                  |
| 14   | 5.32                 | 14.6                             | 23                                                                 |
| 15   | 6.28                 | 6.6                              | 13                                                                 |
| 16   | 6.67                 | 4.1                              | 9                                                                  |
| 17   | 11.94                | 130.1                            | 44                                                                 |
| 18   | 0.53                 | 3.7                              | 37 (but $^3\text{H}$ alone indicates predominantly old water)      |
| 19   | 0.30                 | <sup>a</sup>                     | n.a. (but $^3\text{H}$ alone indicates predominantly old water)    |
| 20   | 7.52                 | 15.5                             | 21                                                                 |
| 21   | 7.94                 | 3.0                              | 6                                                                  |
| 22   | 7.63                 | <sup>a</sup>                     | n.a. (but $^3\text{H}$ alone indicates predominantly modern water) |
| 23   | 6.98                 | 2.9                              | 6                                                                  |

<sup>a</sup> Non-quantifiable

**Table S2**

Substances included in the adjusted data set, with information of *type* (H = herbicide, I = insecticide) and *use* (N = prohibited and not in use, Y = permitted and in use at time of sampling).

| Substance             | Type | In use |
|-----------------------|------|--------|
| 2,4-D                 | H    | N      |
| Atrazine              | H    | N      |
| Atrazine-desethyl     | "    | "      |
| Atrazine-desisopropyl | "    | "      |
| BAM                   | H    | N      |
| Bentazone             | H    | Y      |
| Cyanazine             | H    | N      |
| Dichlorprop           | H    | N      |
| Dimethoate            | I    | N      |
| Ethofumesate          | H    | Y      |
| Fenoxaprop            | H    | Y      |
| Isoproturon           | H    | Y      |
| MCPA                  | H    | Y      |
| Mecoprop              | H    | Y      |
| Metamitron            | H    | Y      |
| Metazachlor           | H    | Y      |
| Metribuzin            | H    | Y      |
| Quinmerac             | H    | Y      |
| Simazine              | H    | N      |
| Terbuthylazine        | H    | N      |

**Table S3**

Results of the pesticide analyses conducted as part of this study.

| Well | Detection (concentration; $\mu\text{g L}^{-1}$ )                                                                                                   |
|------|----------------------------------------------------------------------------------------------------------------------------------------------------|
| 1    | atrazine (0.001 <sup>a</sup> ), metalaxyl (0.002 <sup>a</sup> )                                                                                    |
| 2    | atrazine (0.003), BAM (0.009 <sup>a</sup> ), bentazone (0.069)                                                                                     |
| 3    | atrazine (0.018), atrazine-desethyl (0.023), BAM (0.017), terbuthylazine (0.002), terbuthylazine-desethyl (0.005)                                  |
| 4    | atrazine (0.004), BAM (0.007 <sup>a</sup> )                                                                                                        |
| 5    | atrazine (0.002), atrazine-desethyl (0.009 <sup>a</sup> ), BAM (0.024)                                                                             |
| 6    | atrazine (0.006), atrazine-desethyl (0.006 <sup>a</sup> ), BAM (0.006 <sup>a</sup> )                                                               |
| 7    | -                                                                                                                                                  |
| 8    | -                                                                                                                                                  |
| 9    | bentazone (0.008 <sup>a</sup> )                                                                                                                    |
| 10   | -                                                                                                                                                  |
| 11   | BAM (0.007 <sup>a</sup> )                                                                                                                          |
| 12   | atrazine (0.003), atrazine-desethyl (0.004 <sup>a</sup> ), bentazone (0.15), terbuthylazine (0.006), terbuthylazine-desethyl (0.001 <sup>a</sup> ) |
| 13   | bentazone (0.026)                                                                                                                                  |
| 14   | -                                                                                                                                                  |
| 15   | bentazone (0.004 <sup>a</sup> ), quinmerac (0.001 <sup>a</sup> )                                                                                   |
| 16   | atrazine (0.001 <sup>a</sup> ), atrazine-desethyl (0.002 <sup>a</sup> ), metalaxyl (0.001 <sup>a</sup> ), terbuthylazine-desethyl (0.005)          |
| 17   | atrazine (0.005), atrazine-desethyl (0.1), BAM (0.051), terbuthylazine-desethyl (0.001 <sup>a</sup> )                                              |
| 18   | atrazine (0.004), atrazine-desethyl (0.009 <sup>a</sup> ), BAM (0.008 <sup>a</sup> ), bentazone (0.04)                                             |
| 19   | BAM (0.003 <sup>a</sup> ), mecoprop (0.006 <sup>a</sup> )                                                                                          |
| 20   | atrazine-desethyl (0.008 <sup>a</sup> ), BAM (0.065), terbuthylazine-desethyl (0.003)                                                              |
| 21   | -                                                                                                                                                  |
| 22   | atrazine (0.005), atrazine-desethyl (0.006 <sup>a</sup> ), BAM (0.019)                                                                             |
| 23   | BAM (0.006 <sup>a</sup> ), imidacloprid (0.067), simazine (0.001 <sup>a</sup> )                                                                    |

<sup>a</sup> Trace level detection
